# Supplementary material for: Mixed-species groups in bats: non-random roost associations and roost selection in neotropical understory bats
Source: PubMed Central journal article supplement (PMC8507185; doi:10.1186/s12983-021-00437-6), 2021-10-12
Supplement: 12983_2021_437_MOESM1_ESM.pdf [file 12983_2021_437_MOESM1_ESM.pdf]

## Supplementary information – Additional file 1

### Mixed-species groups in bats: non-random roost associations and roost selection in Neotropical understory bats

Detlev H. Kelm (✉), Ulf Toelch, Mirkka M. Jones

**Table S1:** Number of roosts and observations of bat species in roosts in different habitats (forest vs disturbed)

|                                  |                       |              | Natural roost (forest habitat) | Artificial roost (forest habitat) | Artificial roost (disturbed habitat) |
|----------------------------------|-----------------------|--------------|--------------------------------|-----------------------------------|--------------------------------------|
| Total n roosts / n controls      |                       |              | 89 / 520                       | 21 / 585                          | 23 / 658                             |
| Species                          | Diet                  | Abbreviation | % roost / % controls           |                                   |                                      |
| <i>Saccopteryx bilineata</i>     | Insects               | S.bil        | 22 / 9                         | 0 / 0                             | 0 / 0                                |
| <i>Peropteryx kappleri</i>       | Insects               | P.kap        | 6 / 5                          | 0 / 0                             | 0 / 0                                |
| <i>Trachops cirrhosis</i>        | Insects / vertebrates | T.cir        | 6 / 3                          | 52 / 11                           | 0 / 0                                |
| <i>Micronycteris microtis</i>    | Insects               | M.mic        | 25 / 11                        | 62 / 9                            | 35 / 5                               |
| <i>M. hirsuta</i>                | Insects               | M.hir        | 8 / 2                          | 10 / <1                           | 0 / 0                                |
| <i>Glossophaga sp.</i>           | Nectar / fruits       | G.sp.        | 30 / 13                        | 76 / 21                           | 87 / 40                              |
| <i>G. soricina</i>               | Nectar / fruits       | G.sor        | 0 / 0                          | 0 / 0                             | 39 / 2                               |
| <i>G. commissarisi</i>           | Nectar / fruits       | G.com        | 30 / 13                        | 76 / 21                           | 61 / 5                               |
| <i>Hylonycteris underwoodi</i>   | Nectar                | H.und        | 8 / 2                          | 0 / 0                             | 0 / 0                                |
| <i>Carollia castanea</i>         | Fruits                | C.cast       | 26 / 15                        | 10 / <1                           | 4 / <1                               |
| <i>C. perspicillata</i>          | Fruits                | C.per        | 22 / 13                        | 95 / 24                           | 83 / 14                              |
| <i>C. sowelli</i>                | Fruits                | C.sow        | 20 / 9                         | 81 / 26                           | 43 / 4                               |
| <i>C. perspicillata/sowellii</i> | Fruits                | C.per/C.sow  | 36 / 24                        | 100 / 60                          | 96 / 60                              |
| <i>Desmodus rotundus</i>         | Blood                 | D.rot        | 8 / 12                         | 14 / 1                            | 0 / 0                                |

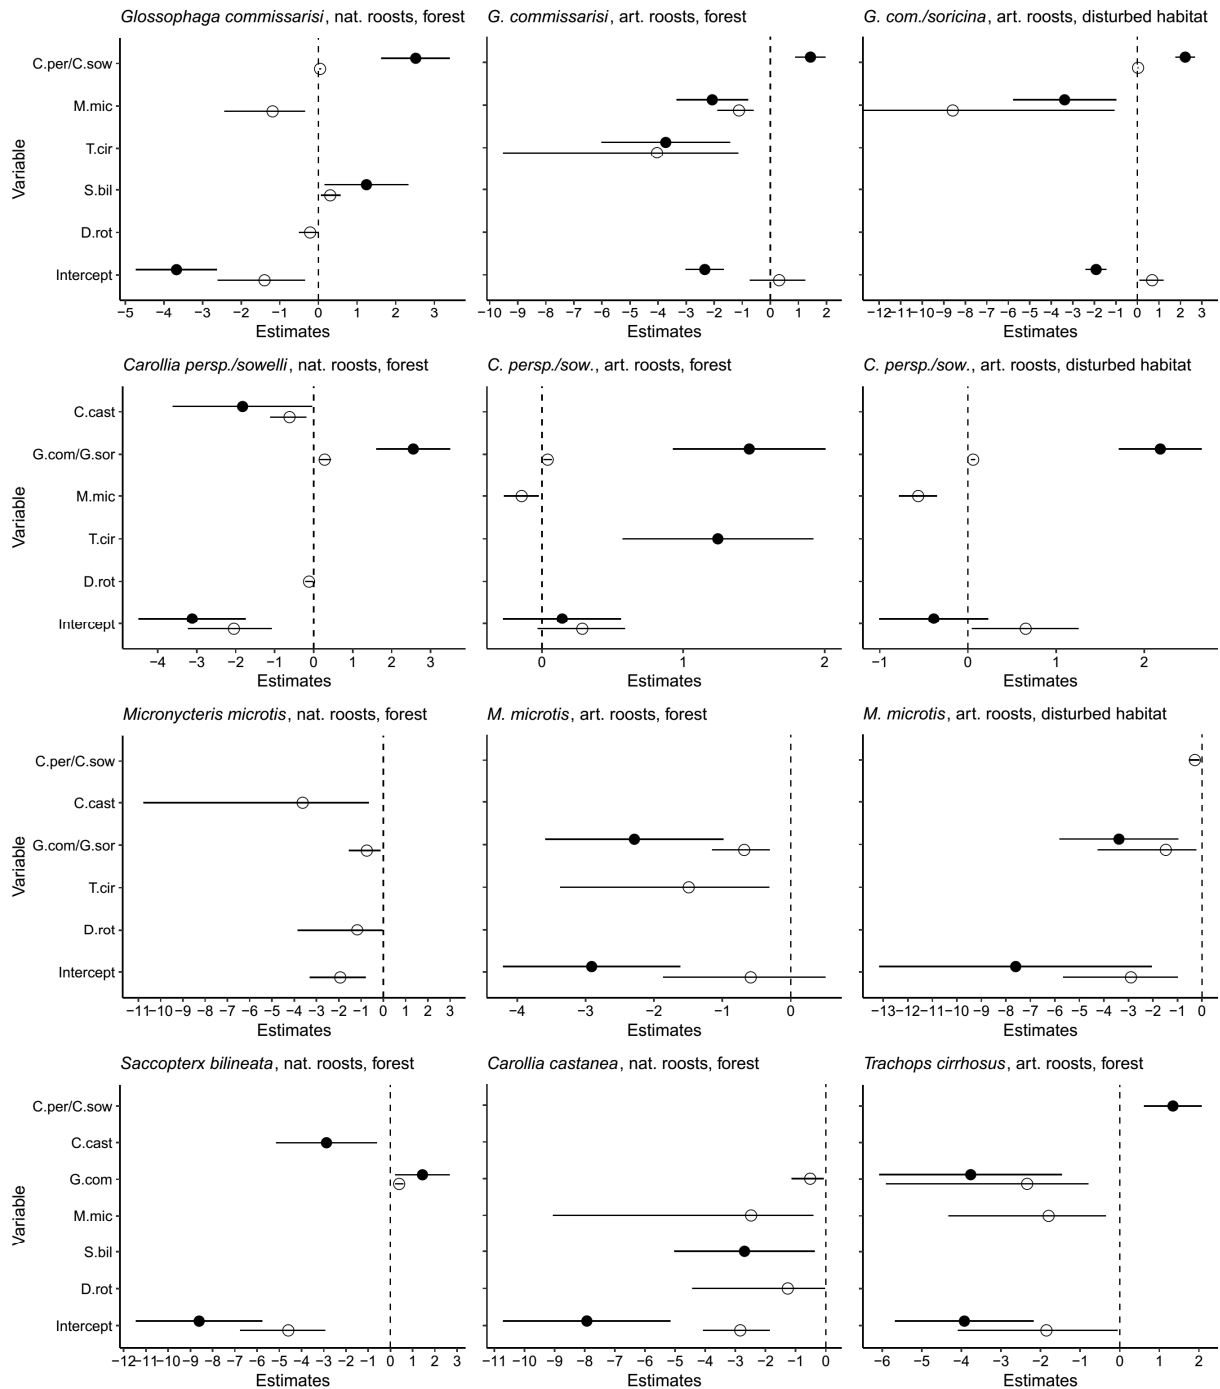

**Fig. S1:** GLMM beta parameter estimates for the effect of the presence (black circles) or abundance (open circles) of selected other bat species on the incidence of a focal bat species in natural and in artificial roosts in the forest habitat and artificial roosts in the disturbed habitat. The data for the sibling species *Carollia perspicillata* and *C. sowelli* were pooled. The plots only show those species for which a significant positive or negative effect of co-occurrence was detected. Models without any significant effects are not presented. For species abbreviations see the text and table S1. The error bars are 95% credible intervals.

**Table S2:** Roost variables used for modelling species-specific roost selection, their mean and range (in parentheses) in roosts occupied by each of six focal bat species, and the percentage of roosts occupied by each bat species that were in standing (not fallen) trees. For species abbreviations see the text and table S1.

| Species | Roosts (n) | Roost volume (m <sup>3</sup> ) | Size of the entrance (m <sup>2</sup> ) | Distance of the roosting site from the entrance (m) | Distance of the roosting site above the ground (m) | Vegetation density (scale 0-10) | Canopy height (m) | Roosts in standing trees (%) |
|---------|------------|--------------------------------|----------------------------------------|-----------------------------------------------------|----------------------------------------------------|---------------------------------|-------------------|------------------------------|
| G.com   | 24         | 6.7 (0.4-32.6)                 | 0.7 (0.1-3.0)                          | 3.5 (1.0-11.2)                                      | 4.8 (0.6-17.0)                                     | 4.1 (2-8)                       | 34.8 (20-45)      | 88                           |
| C.per   | 18         | 9.6 (1.2-32.6)                 | 0.9 (0.1-3.0)                          | 3.7 (1.0-10.3)                                      | 5.7 (2.2-12.3)                                     | 4.1 (2-6)                       | 38.6 (25-45)      | 100                          |
| C.sow   | 18         | 3.5 (0.4-18.8)                 | 0.4 (0.1-1.5)                          | 3.1 (1.0-10.3)                                      | 3.8 (0.6-12.3)                                     | 4.3 (2-8)                       | 32.3 (20-45)      | 78                           |
| C.cast  | 18         | 1.3 (0.1-4.5)                  | 0.9 (0.1-2.9)                          | 1.2 (0.2-5.7)                                       | 2.4 (0.5-6.0)                                      | 4.4 (3-6)                       | 30.6 (20-40)      | 61                           |
| M.mic   | 16         | 2.9 (0.1-18.8)                 | 0.6 (0.1-5.0)                          | 3.3 (0.5-9.0)                                       | 1.1 (0.3-5.0)                                      | 4.8 (4-7)                       | 28.1 (15-35)      | 19                           |
| S.bil   | 11         | 11.6 (0.2-32.6)                | 1.3 (0.1-3.0)                          | 2.5 (0.3-4.8)                                       | 4.8 (3.0-7.5)                                      | 3.9 (2-5)                       | 36.4 (20-45)      | 100                          |

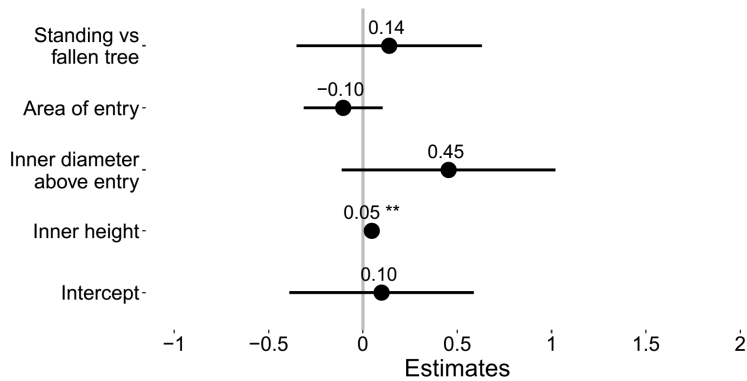

**Fig. S2:** Results of GLM on the effect of roost parameters on the total number of bat species using natural roosts (not necessarily simultaneously). The numbers next to the points representing beta parameter estimates are p-values and the asterisks indicate a significant effect (\*\* p<0.001)

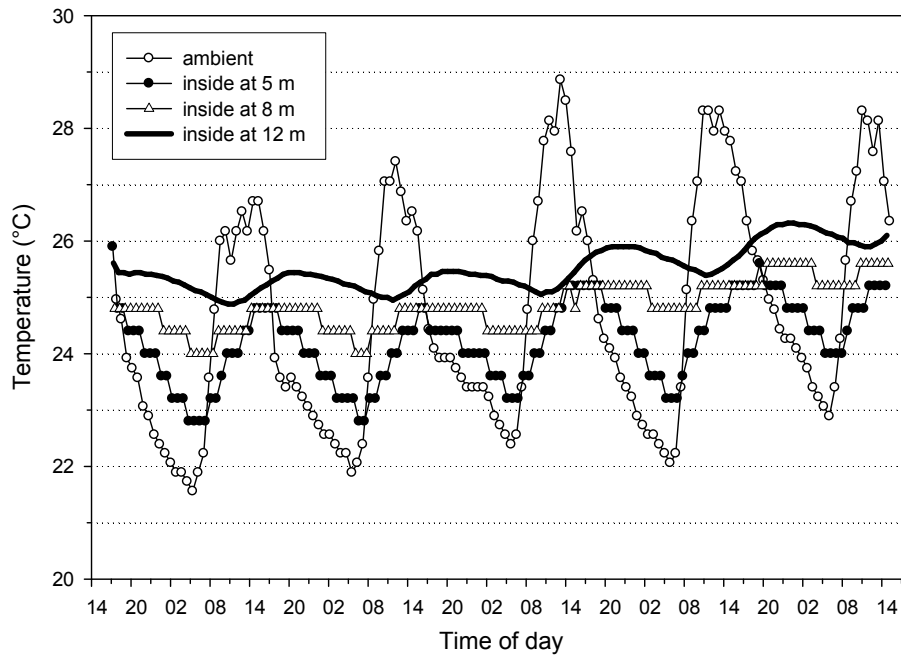

**Fig. S3:** Temperature during five days at three different heights inside a bat roost in a large hollow tree
